1 **Effect of straw incorporation and nitrification inhibitor on nitrous oxide emission**  
2 **in various cropland soils and its microbial mechanism**

3

4 Ya-Bo Zhang<sup>1,2</sup>, Feng Liu<sup>1,3</sup>, Jun-Tao Wang<sup>1,4\*</sup>, Hang-Wei Hu<sup>5</sup>, Ji-Zheng He<sup>1,5</sup>, Li-Mei  
5 Zhang<sup>1,2</sup>

6

7 1 State Key Laboratory of Urban and Regional Ecology, Research Center for Eco-  
8 Environmental Sciences, Chinese Academy of Sciences, Beijing 100085, China

9 2 University of Chinese Academy of Sciences, Beijing 100049, China

10 3 Key Laboratory of Vertebrate Evolution and Human Origins of Chinese Academy of  
11 Sciences, Institute of Vertebrate Paleontology and Paleoanthropology, Chinese  
12 Academy of Sciences, Beijing, 100044, China

13 4 Hawkesbury Institute for the Environment, Western Sydney University, Penrith, New  
14 South Wales 2751, Australia

15 5 Faculty of Veterinary and Agricultural Sciences, the University of Melbourne,  
16 Parkville, Victoria 3011, Australia

17

18 For correspondence:

19 \*Jun-Tao Wang, E-mail: [jtwang@rcees.ac.cn](mailto:jtwang@rcees.ac.cn) or [juntao.wang@westernsydney.edu.au](mailto:juntao.wang@westernsydney.edu.au)

20

21 **Abstract:**

22 Nitrification inhibitor and straw incorporation are widely used to improve crop nitrogen  
23 use efficiency in agricultural soil, but their effects on nitrous oxide (N<sub>2</sub>O) emission  
24 across different soil types and the microbial mechanisms remain less understood. In this  
25 study, we used controlled experiment and DNA-based molecular analysis to study how  
26 nitrification inhibitor (dicyandiamide, DCD) and straw incorporation affect soil  
27 nitrogen balance, N<sub>2</sub>O emission and microbial nitrifiers/denitrifiers in three distinct  
28 agricultural soils (the black, fluvo-aquic and red soils) across China. Both DCD and  
29 straw incorporation improved nitrogen balance by increasing NH<sub>4</sub><sup>+</sup> and decreasing  
30 NO<sub>3</sub><sup>-</sup> in all soils. DCD tended to decrease N<sub>2</sub>O emission from all soils especially the  
31 fluvo-aquic one, while straw incorporation reduced N<sub>2</sub>O emission only in the fluvo-  
32 aquic soil but increased N<sub>2</sub>O emission in the other two especially the red soil (by  
33 ~600%). T-RFLP analysis revealed that the denitrifiers community structure are distinct  
34 among the three soils but was not strongly affected by DCD or straw incorporation.  
35 qPCR analysis revealed that DCD or straw incorporation had no significant effect on  
36 nitrifier abundance but increased nitrous oxide reductase *nosZ* gene abundance in the  
37 black/fluvo-aquic soil rather than the red soil. Structural equational modelling further  
38 confirmed that, when accounting for treatments and soil properties, *nosZ* gene  
39 abundance is the only biological factor significantly determined N<sub>2</sub>O emission in  
40 different soil types. Taken together, our work advanced the knowledge on the  
41 agricultural practices and N<sub>2</sub>O emission in cropland soils, suggesting that straw  
42 incorporation may not be a good choice for the red and black soil areas; management  
43 practices should be used as *per* soil type to balance between nitrogen use efficiency and  
44 N<sub>2</sub>O emission.

45 **Keywords:** Nitrous oxide, straw incorporation, nitrification inhibitor, denitrifiers,  
46 denitrification

47

## 48 **Introduction**

49 As a powerful greenhouse gas, nitrous oxide (N<sub>2</sub>O) is 256 times stronger than carbon  
50 dioxide in warming potential, and is widely recognized as a major contributor to ozone  
51 depletion (IPCC, 2014; Ravishankara et al., 2009). The use of synthetic nitrogen  
52 fertilizers in agricultural production is the biggest source of N<sub>2</sub>O emissions. It was  
53 estimated that 60% of the global N<sub>2</sub>O emission (about 4.1 Tg N yr<sup>-1</sup>) could be attributed  
54 to synthetic nitrogen fertilizers application (c.a. 140 Tg N yr<sup>-1</sup>) (IPCC, 2013). In the  
55 context of the global food crisis and climate change, it is particularly urgent to optimize  
56 fertilization strategies to increase nitrogen fertilizer use efficiency (NUE) while  
57 reducing N<sub>2</sub>O emissions from agricultural soils.

58 Straw incorporation (SI) and nitrification inhibitor (NI) are common practices  
59 employed to improve the NUE in cropland soils (Di et al., 2014), but their performances  
60 on regulating soil N<sub>2</sub>O emissions remained uncertain. For example, straw incorporation  
61 potentially increased the N<sub>2</sub>O emission in an aquic cropland soil (Xu et al., 2019), but  
62 may not affect the N<sub>2</sub>O emissions in a red soil under traditional synthetic fertilizer  
63 treatment (Wu et al., 2020). The widely used inhibitor dicyandiamide (DCD), even  
64 though largely suppressed the N<sub>2</sub>O emissions in an acidic loamy clay soil (Ning et al.,  
65 2018), might slightly increase the N<sub>2</sub>O emission from agricultural soils when globally  
66 assessed (Lam et al., 2017). These results indicated that the influence of SI and NI on  
67 N<sub>2</sub>O emission can be largely limited by soil conditions especially soil types, and a  
68 mechanistic interpretation on the N<sub>2</sub>O emission pattern across different soil types is  
69 essential for deploying fertilization strategies to mitigate N<sub>2</sub>O emissions and improve  
70 crop NUE.

71 In cropland soils, nitrous oxide is mostly emitted as an intermediate product of  
72 heterotrophic denitrification (NO<sub>3</sub><sup>-</sup>→NO<sub>2</sub><sup>-</sup>→NO<sup>-</sup>→N<sub>2</sub>O→N<sub>2</sub>) or/and as a by-product  
73 of ammonia oxidation (Butterbach-Bahl et al., 2013; Hu et al., 2015). The former  
74 pathway is driven by denitrifiers containing nitrite reductase (*nirK*) and/or nitrous oxide  
75 reductase (*nosZ*) genes. The latter is driven by ammonia-oxidizing bacteria/archaea  
76 (AOB/AOA) that encode ammonia-monooxygenase  $\alpha$ -subunit gene (*amoA*). Changes  
77 of these functional microbial groups are essential for mechanistic interpretation on the  
78 response N<sub>2</sub>O emission to fertilization strategies (Chen et al. 2013). Straw incorporation  
79 doubled the abundance of *nosZ* gene, the only known biological link that reduces N<sub>2</sub>O  
80 emissions, in an acidic soil (Miller et al. 2012), but potentially increase the emissions  
81 of N<sub>2</sub>O from cropland soils across large spatial scales (Zhao et al. 2020). Previous study  
82 showed that DCD stressed paddy soil N<sub>2</sub>O emission via inhibiting the metabolic activity

83 of AOB rather than AOA (Zhou et al. 2020). DCD was also reported to potentially  
84 reduce denitrification activity via reducing denitrification substrate ( $\text{NO}_3^-$ )  
85 concentration rather than the abundance of *nirK* gene in a paddy soil (Meng et al., 2020).  
86 Considering that soil nitrifier and denitrifier communities are highly variable across  
87 environmental gradient (Jones and Hallin 2010, Hu et al. 2015), how DCD and straw  
88 incorporation affect the nitrifier/denitrifier and regulate the  $\text{N}_2\text{O}$  emissions across  
89 different soil types remains uncertain.

90 The black, fluvo-aquic, and red soils are representative of the main part of the  
91 agricultural areas across eastern China that accounts for more than half of the crop  
92 productions in China. Proper agricultural management policy across these areas is  
93 necessary for crop safe and environmental sustainability. Here, we used a controlled  
94 experiment to determine the performance of SI and NI on  $\text{N}_2\text{O}$  in these three distinct  
95 soils. The responses of denitrifying and ammonia-oxidizing microorganisms were  
96 characterized by DNA molecular analysis, such as quantitative PCR and Terminal  
97 Restriction Fragment Length Polymorphism (T-RFLP). We aimed (1) to compare the  
98 performance of SI and NI on  $\text{N}_2\text{O}$  emissions in different soil types, and (2) to unravel  
99 the microbial mechanism by which NI and SI affect soil  $\text{N}_2\text{O}$  emissions among different  
100 soils. We wish our work can provide data support for deploying suitable fertilization  
101 strategies to both improve the crop NUE and mitigate soil  $\text{N}_2\text{O}$  emissions in different  
102 agricultural areas.

## 103 **Materials and methods**

### 104 **Soil basic information and controlled experiment setup**

105 The soils used in the pot experiment were collected from agricultural areas in Taoyuan  
106 (TY, 111.26°E, 28.55°N), Xuchang (XC, 113.48°E, 34.08°N) and Gongzhuling (GZL,  
107 124.49°E, 43.32°N), respectively. According to the World Reference Base (WRB), they  
108 were classified as Red soil (pH 4.43), Fluvo-aquic soil (pH 7.18) and Black soil (pH  
109 5.74), respectively. The average annual temperature and precipitation in TY, GZL, and  
110 XC sites were 16.5°C/1440mm, 5.6°C/615mm and 13.9°C/595mm, respectively. Crop  
111 residuals and stones were removed, screened through a 2-mm sieve before transported  
112 to the greenhouse.

113 The pot experiment was set up in May, 2015. For each soil type, there were four  
114 fertilization treatments including unfertilized control (CK), using nitrogen fertilizer  
115 only, i.e., using urea equivalent to 200 kg N ha<sup>-1</sup> (N), addition of 5% nitrification  
116 inhibitor (N+NI) and incorporation of maize straw (N+SI) with nitrogen fertilizer. Each  
117 treatment had four replicates. The corn straw used in N+SI treatment was collected from

118 the same sites where the soils were collected. Phosphorus and potassium (equivalent to  
119 90 kg P<sub>2</sub>O<sub>5</sub> ha<sup>-1</sup> and 90 kg K<sub>2</sub>O ha<sup>-1</sup>, respectively) were applied as the basal fertilizers  
120 for all the treatments. All pots (with 10 kg soil each) were irrigated to 60% water hold  
121 capacity (WHC) before seeding. The pots (Φ: 25cm × H: 25cm) were randomly  
122 arranged in greenhouse with constant temperature at ~20°C. A widely grown maize  
123 variety *Zhengdan 985* was used in this experiment.

#### 124 **Gas sampling and N<sub>2</sub>O measurement**

125 Soil N<sub>2</sub>O flux were monitored using the static chamber/gas chromatograph as described  
126 before (Ding et al., 2015). Briefly, the soil column was covered by a Φ: 25cm × H: 60  
127 cm transparent plexiglass chamber (with electric fan installed on the top to mix the air  
128 in the headspace) and a water-filled groove was used to seal the system. The sample  
129 collection time was from 10:00 to 11:00 on the 2, 4, 6, 8, 10, 12, 16, 20, 27 days after  
130 seeding. There were three time points (at 0, 15th, 30th min) for each collection; at each  
131 time point, a syringe is used to collect gas samples (30 ml) from the chamber. These  
132 samples were stored in glass cylinders and then determined by a gas chromatography  
133 (Agilent 7890B, Santa Clara, CA, USA) with electron capture detector (μECD). In all,  
134 1,296 gas samples were collected and measured. Calculation of N<sub>2</sub>O flux was  
135 performed via a linear regression model (Wang et al., 2018b),

$$136 \quad F = \rho \times (P/101.3) \times (V/A) \times (\Delta c/\Delta t) \times 273/(273+T)$$

137 where  $F$  indicates N<sub>2</sub>O flux (μg N<sub>2</sub>O-N m<sup>-2</sup> h<sup>-1</sup>),  $\rho$  indicates N<sub>2</sub>O density at 0°C and  
138 101.3 KPa (kg m<sup>-3</sup>),  $V$  indicates chamber volume (m<sup>3</sup>),  $A$  indicates chamber surface area,  
139  $\Delta c/\Delta t$  indicates N<sub>2</sub>O accumulation rate within chamber (ppbv N<sub>2</sub>O-N h<sup>-1</sup>),  $T$  (Celsius)  
140 indicates mean air temperature in chamber, and  $P$  (mm Hg) indicates instant  
141 atmospheric pressure. Cumulative N<sub>2</sub>O emission ( $E$ , kg N ha<sup>-1</sup>) was calculated by the  
142 equation (Chen et al., 2016),

$$143 \quad E_{N_2O} = \sum_{i=1}^n (f_i + f_{i+1})/2 \times (t_{i+1} - t_i) \times 24 \times 10^{-5}$$

144 where  $f$  indicates gas flux (μg N<sub>2</sub>O-N m<sup>-2</sup> h<sup>-1</sup>),  $n$  indicates the total measurement  
145 numbers,  $i$  is the sampling time, and  $(t_{i+1} - t_i)$  represents the interval of two sampling. We  
146 measured the N<sub>2</sub>O flux only in the early stage of corn growth because N<sub>2</sub>O emissions  
147 usually peaked soon after fertilization (Yang et al., 2017).

#### 148 **Soil physicochemical analysis**

149 Soil samples were collected on days 0, 15, 60 and 120 after seeding. At each time point,  
150 we carefully collected 3 soil cores with a depth of 0-20 cm in each pot about 10 cm  
151 away from the axial root and mixed them evenly to make composite samples. In all,  
152 192 soil samples were collected for downstream analysis, and they were stored at 4°C

153 for property measurement and -80°C for DNA extraction, respectively.

154 Soil pH was measured (water to soil ratio of 2.5:1 v/w) by a Delta 320 pH meter  
155 (Mettler-Toledo, China). Soil water content was determined by oven-drying the fresh  
156 samples in 105 °C for 24 hours. NH<sub>4</sub><sup>+</sup>-N and NO<sub>3</sub><sup>-</sup>-N were extracted with 1 M KCl  
157 solution and determined by the continuous flow analysis system (SAN++, Skalar,  
158 Holland). A Fusion Total Organic Carbon Analyzer (Tekmar Dohrmann, USA) was  
159 used to measure the dissolved organic carbon (DOC) extraction (0.5M K<sub>2</sub>SO<sub>4</sub>).

160 Potential nitrification rate (PNR) was determined by the sodium azide inhibition  
161 method (Wang et al., 2018a). Fresh soil sample (5g) was added to a 50ml centrifuge  
162 tube containing 20ml (1mM) solution of phosphate buffer (PBS) (g L<sup>-1</sup>: NaCl, 8.0; KCl,  
163 0.2; NaHPO<sub>4</sub>, 1.44; KH<sub>2</sub>PO<sub>4</sub>, 0.24; pH=7.4) with 1mM (NH<sub>4</sub>)<sub>2</sub>SO<sub>4</sub> and 10mM KClO<sub>3</sub>  
164 to inhibit nitrite oxidation. After incubating the suspension in dark on a shaker at 180  
165 rpm for 24 hours (25°C), the nitrite was extracted using 5ml of 2M KCl and determined  
166 by a Griess-Ilosvay spectrophotometry.

#### 167 **DNA extraction, Terminal Restriction Fragment Length Polymorphism (T-RFLP)** 168 **and real-time quantitative PCR (qPCR) analysis**

169 According to the manufacturer's instructions, soil metagenomic DNA was extracted  
170 from 0.3g soil using mobio PowerSOil DNA Isolation Kit (MoBio laboratories,  
171 Carlsbad, CA, USA). A Nanodrop ND-2000c UV-Vis spectrophotometer (NanoDrop  
172 Technologies, Wilmington, DE, USA) was used to measure the quantity and quality of  
173 DNA. The DNA extractions were stored in -20°C freezer for molecular analysis.

174 T-RFLP was employed to determine the community structure of denitrifying  
175 bacteria containing *nirK* and *nosZ* genes. Primer pairs F1aCu/R3Cu and nosZ-  
176 F/nosZ1662R were employed for *nirK* gene and *nosZ* gene amplification, respectively  
177 (Hallin and Lindgren, 1999; Throback et al., 2004). The forward primers were labelled  
178 with fluorescent dye 6-carboxyfluorescein (6-FAM) mark. The 50µl PCR amplification  
179 system contains 25µl 2× SYBR Green Premix Ex Taq™ (TaKaRa Biotechnology,  
180 Japan), 2µl of each primer (10µM), 3µl of template DNA and 20µl ddH<sub>2</sub>O. PCR cycling  
181 conditions of the *nirK* and *nosZ* genes are listed in Table S1. Purified amplicons were  
182 digested with restriction enzymes MspI (TaKaRa, Japan) and submitted for fragment  
183 scan. Terminal spectra were analyzed by GeneMarker V2.2.0 software (SoftGenetics-  
184 LLC, Pennsylvania, USA). The fragments with less than 1bp length variation were  
185 combined, and peaks with height less than 0.5% of the maximum value were excluded.

186 The copies of *amoA*, *nirK* and *nosZ* genes was determined using an iCycler iQ5  
187 Real-Time PCR detection system (Bio-Rad Laboratories, USA). Primer pairs and

188 thermal cycling programs are listed in Table S1. The 25 $\mu$ l qPCR reaction system  
189 contains 12.5  $\mu$ l 2 $\times$ SYBR Green Premix Ex Taq<sup>TM</sup> (TaKaRa Biotechnology, Japan),  
190 0.5 $\mu$ l of each primer (10  $\mu$ M), 1.5 $\mu$ l template DNA and 10.5 $\mu$ l ddH<sub>2</sub>O.

### 191 **Statistical Analysis**

192 One-way analysis of variance (ANOVA) followed by Duncan test (significance level  $P$   
193  $< 0.05$ ) were used to test the difference of gas emissions/soil properties/genes copies  
194 among fertilization treatments. The Bray-Curtis dissimilarity matrix was calculated,  
195 based on the fragment composition of T-RFLP analysis, to determine the response of  
196 denitrifier community containing *nirK* and *nosZ* genes to fertilization treatments.  
197 Resultant matrices were ordinated by the nonmetric multidimensional scaling (NMDS)  
198 algorithm. These statistical analyses were conducted with SPSS19 software (IBM, USA)  
199 and the *vegan* package (Dixon, 2003) in R ([www.r-project.org](http://www.r-project.org)). Boxplots were  
200 generated using the *ggplot2* package (Ginestet, 2011) in R. Structural equation model  
201 (SEM) was used to evaluate the effects of management, denitrifiers and edaphic  
202 properties on the N<sub>2</sub>O flux. Parameters including approximate root mean square error  
203 ( $0 \leq \text{RMSEA} \leq 0.05$ ),  $P$  value ( $> 0.05$ ) and Chi-square were used to evaluate the fitness  
204 of the model. The SEM analysis was conducted using AMOS17.0 (AMOS IBM, USA).

## 205 **Results**

### 206 **Soil carbon, nitrogen, pH, and nitrification potential**

207 Compared with the urea fertilization treatment (N), adding DCD (N+NI) significantly  
208 ( $P < 0.05$ ) increased the NH<sub>4</sub><sup>+</sup> in all the soils, and a maximum value was observed around  
209 the 15th days after seeding; by contrast, the effect of straw incorporation (N+SI) was  
210 weaker (Fig. 1 a-c). Both DCD and straw incorporation decreased soil NO<sub>3</sub><sup>-</sup>, and the  
211 former had stronger influence (Fig. 1d-f). Compared with N treatment, DCD or straw  
212 didn't significantly affect dissolved organic carbon (DOC) in all soils (Fig. S2).  
213 Fertilizations (N, N+NI, N+SI) caused soil acidification and after 60 days, the lowest  
214 pH appeared in the red (4.93) and black (4.35) soils (Fig S3). The potential nitrification  
215 rate (PNR) first decreased constantly after 15 days in the fluvo-aquic soil but may  
216 retrieve in the other two (Fig S4). DCD significantly decrease PNR only in the black  
217 soil, and straw incorporation had no consistent effect.

### 218 **Flux and accumulative N<sub>2</sub>O emissions**

219 In the black soil, the fertilized treatments (N, N+NI, N+SI) had higher N<sub>2</sub>O flux than  
220 the unfertilized control (CK) (Fig S1a) and therefore accumulated more N<sub>2</sub>O (Fig 2a).  
221 Straw incorporation increased ~50% N<sub>2</sub>O emissions from black soil, while DCD had  
222 no significant effect. In the fluvo-aquic soil, nitrogen fertilization (N) significantly

223 increased the N<sub>2</sub>O flux at the early stage (days 0-3); adding DCD rather than straw  
224 incorporation can effectively alleviate such trend (Fig S1b). Accumulatively, DCD  
225 reduced ~60% N<sub>2</sub>O emission from the fluvo-aquic soil, while straw incorporation had  
226 no such strong effect (Fig 2b). DCD had no significant effect on the N<sub>2</sub>O flux (Fig S1.c)  
227 or accumulative emissions (Fig 2c) in the red soil, while straw incorporation strongly  
228 and significantly increased the N<sub>2</sub>O flux throughout the whole stage, and such effect  
229 became stronger with time ( $P<0.05$ ). Specifically, the N<sub>2</sub>O accumulation of N+SI  
230 treatment was ~600% higher than N treatments ( $P<0.05$ ).

### 231 ***nirK*- and *nosZ*-containing denitrifier community**

232 T-RFLP analysis showed that the black soil, fluvo-aquic soil and red soil had distinct  
233 denitrifier communities (Fig. 3). Both the *nirK*-containing denitrifiers assemblages and  
234 *nosZ*-containing denitrifiers were similar within the same soil but distinct between the  
235 three soils. And *nosZ*-containing denitrifier community is more conservative than *nirK*-  
236 containing denitrifier within the same soil. No significant difference was observed  
237 among different treatments on the same soil; either DCD or straw incorporation did not  
238 change the denitrifier community.

### 239 **Abundances of nitrifier and denitrifier functional genes**

240 The abundance of archaeal and bacterial *amoA* gene (copies *per* gram dry soil)  
241 were both lower in the red soil ( $4.56 \times 10^6$  to  $6.29 \times 10^6$  for AOA, and  $1.79 \times 10^7$  to  
242  $2.53 \times 10^7$  for AOB) than in the fluvo-aquic soil ( $3.76 \times 10^7$  to  $1.13 \times 10^8$  for AOA, and  
243  $4.23 \times 10^7$  to  $5.75 \times 10^7$  for AOB), but no significant changes of the *amoA* genes copies  
244 was observed among different fertilization treatments (Fig. S5).

245 Overall, the abundance of *nirK* gene in the black soil ( $4.3 \times 10^6$  to  $7.57 \times 10^6$ ) was  
246 lower than in the fluvo-aquic soil ( $2.98 \times 10^7$  to  $4.37 \times 10^7$ ) and the red soil ( $3.94 \times 10^7$   
247 to  $6.22 \times 10^7$ ); however, for each soil, there was no significant changes in *nirK* gene  
248 abundance among different fertilization treatments (Fig. 4a-c). DCD and straw  
249 incorporation increased the abundance of *nosZ* gene in the black and fluvo-aquic soils  
250 (Fig. 4d). No significant variation of the *nosZ* gene abundances was observed among  
251 all treatments in the red soil (Fig. 4 e-f).

### 252 **Structural equation modelling**

253 To further clarify their contributions to N<sub>2</sub>O emission across different soils, we used the  
254 structural equation model (SEM) to evaluate the effects (both direct and indirect) of  
255 straw incorporation, DCD, soil dissolved organic carbon, nitrite reductase and nitrous  
256 oxide reductase. Dissolved organic carbon (0.72) and straw incorporation (0.47) had  
257 strong and positive effects on N<sub>2</sub>O flux, whereas nitrous oxide reductase gene (*nosZ*)



258 abundance had significantly negative effect (-0.52) on N<sub>2</sub>O flux (Fig. 5a). Straw  
259 incorporation, however, does not directly increase the dissolved organic carbon, which  
260 is an important factor that regulates the *nirK* gene abundance and communities  
261 containing *nosZ* gene. Accounting all the biotic and abiotic factors together, the SEM  
262 explained 51.0% of the variance in N<sub>2</sub>O flux (Fig. 5a). It supported that straw  
263 incorporation is an important management practice that can increase the risk of N<sub>2</sub>O  
264 emission; soil DOC is the most important abiotic factor while *nosZ* gene abundance is  
265 the only significant biotic factor that affect the N<sub>2</sub>O emission (Fig. 5b).

## 266 **Discussion**

267 In facing of the increasing concentration of atmospheric N<sub>2</sub>O, various management  
268 practices were used to improve nitrogen fertilizer utilization and regulate N<sub>2</sub>O  
269 emissions from cropland soils (Zhu et al. 2019). Nitrification inhibitors like DCD can  
270 inhibit the conversion from NH<sub>4</sub><sup>+</sup>-N to NO<sub>2</sub><sup>-</sup>/NO<sub>3</sub><sup>-</sup> and thereafter reduce substrate from  
271 pathways generating N<sub>2</sub>O. Straw incorporation can significantly increase soil organic  
272 carbon (SOC) by 12.8% and improve soil nutrient availability for crop in global  
273 croplands (Liu et al., 2014), and can potentially mitigate N<sub>2</sub>O emissions (Badagliacca  
274 et al., 2017). However, the performance of DCD and straw incorporation on N<sub>2</sub>O  
275 emission from different types of soils had not been parallely evaluated. Using  
276 controlled experiment and DNA-based molecular analysis on three distinct cropland  
277 soils, we showed that the performance of DCD and straw incorporation on N<sub>2</sub>O  
278 emission are distinct in different soils, and multiple factors contributed to such pattern.

### 279 **Soil physicochemical properties and N<sub>2</sub>O emission**

280 Soil pH is reported to be important factor affecting N<sub>2</sub>O emissions (Signor and  
281 Cerri, 2013), and some studies showed that pH can directly affects the activity of  
282 nitrification and denitrification reductase (Granli and Bockman, 1994). A few studies  
283 reported that the emission of N<sub>2</sub>O would be greater in lower pH habitat (Chapuis-Lardy  
284 et al., 2007). Our study supported this since straw incorporation increased more N<sub>2</sub>O  
285 emission in low pH red soils (pH=4.43) than high pH fluvo-aquic soils (pH=7.18).

286 Besides soil pH, the organic carbon is another important regulating factor. Soil  
287 carbon not only directly provides energy to the denitrifier, but also promotes microbial  
288 consumption on O<sub>2</sub>, creating favorable conditions for denitrification (Beauchamp E G,  
289 1989). Miller et al. (2008) found that the available carbon increases microbial activity  
290 and oxygen consumption, leading to favorable conditions for denitrification. Previous  
291 studies have found that increased DOC levels are associated with increased N<sub>2</sub>O  
292 emissions, as activated carbon is a key role for the electron acceptor for microbial

293 denitrification (Harter et al., 2014). Besides, some studies reported that DOC is a  
294 measurement of existing resources for microbial growth and biodegradation and is  
295 generally considered a good indicator of carbon effectiveness (Jensen et al., 1997; Liang  
296 et al., 1996). Many others reported that short-term straw incorporation to the field  
297 increases the DOC concentration than not incorporation it to the field (Chen et al., 2017;  
298 Guo et al., 2014; Li et al., 2013). Our study supported that straw incorporation  
299 significantly promoted DOC content in all soils. The decomposition of straw releases  
300 nutrients and DOC, which stimulates the biological activities of microorganisms (Wang  
301 et al., 2015).

### 302 **Response of functional microbes**

303 The *nirK* gene encodes nitrite reductase that catalyzes the conversion from  $\text{NO}_2^-$  to  
304 NO, while the *nosZ* gene encodes nitrous oxide reductase that can consume  $\text{N}_2\text{O}$  ( $\text{N}_2\text{O}$ -  
305  $\text{N}_2$ ), the only known biological link that reduces  $\text{N}_2\text{O}$  emissions. DCD affected the  
306 abundance of the *nirK* genes, probably because the *nirK* gene communities are also  
307 ammonia oxidizers, which are inhibited by DCD (Di et al., 2014). Huang et al. (2004)  
308 reported that denitrifying bacteria may consume soil DOC, thereby producing  
309 denitrification and increasing  $\text{N}_2\text{O}$  emissions. Our research found that straw  
310 incorporation significantly increased  $\text{N}_2\text{O}$  emissions especially in red soils (Fig. 2). The  
311 nitrogen in the straw was returned to the field and became an additional nitrogen input,  
312 which might be the main cause of the direct increase in  $\text{N}_2\text{O}$  emissions (Lu et al., 2010).

313 Nitrification inhibitors is a widely used strategy to reduce soil  $\text{N}_2\text{O}$  emissions  
314 (Snyder et al., 2009) since it decreased the autotrophic nitrification (Bauhus et al., 1996).  
315 Some studies reported that DCD had a significant effect on reducing  $\text{N}_2\text{O}$  emission of  
316 maize compared with only nitrogen application (Ding et al., 2011; Zhou et al., 2016).  
317 Our result is consistent with the above findings and showed that the N+NI treatment  
318 reduced  $\text{N}_2\text{O}$  emission in fluvo-aquic soil compared with the N treatment (Fig. 2b).  
319 Compared with other treatment, N+NI treatment increased the concentration of  $\text{NH}_4^+$ -  
320 N (Fig. S1), possibly because nitrification inhibitor application blocked ammonia  
321 monooxygenase enzyme and retained  $\text{NH}_4^+$ -N (Abbasi and Adams, 2000; Wolt, 2004),  
322 thereby mitigating  $\text{N}_2\text{O}$  emissions from soils.

### 323 **Conclusions**

324 Our study provided evidence that straw incorporation better suits the fluvo-aquic soil  
325 but might not be suitable for the black or red soils since it can potentially increase  $\text{N}_2\text{O}$   
326 emission (especially from the red soil). Nitrification inhibitor DCD is comparably safe  
327 in  $\text{N}_2\text{O}$  emissions and could be deployed in variable soils. The response of *nosZ* gene

328 abundance to inhibitor/straw incorporation is the main biological factor determining the  
329 soil N<sub>2</sub>O emission from different soils. This work advanced our understanding on the  
330 agricultural practices and N<sub>2</sub>O emission in cropland soils, suggesting that management  
331 practices should be used as *per* soil types to balance between nitrogen use efficiency  
332 and N<sub>2</sub>O emission.

### 333 **Acknowledgements**

334 This work was financially supported by the National Key R&D Program  
335 (2017YFD0800604) and National Natural Science Foundation of China (41771288).  
336 We thank Peng-Xia Xu, Ya-Qi Wang, Shuai Du, and Liu-Ying Mo for their assistance  
337 in greenhouse and laboratory work.

### 338 **Author contributions**

339 LMZ and JZH designed the study. FL collected data in field and lab work. YBZ and  
340 JTW analyzed the data. YBZ, JTW, HWH and LMZ wrote the manuscript in close  
341 consultation from all authors.

### 342 **Conflict of interest declaration**

343 The authors have no conflict of interest to declare.

### 344 **References**

- 345 Abbasi, M.K., Adams, W.A., 2000. Estimation of simultaneous nitrification and denitrification in  
346 grassland soil associated with urea-N using <sup>15</sup>N and nitrification inhibitor. *Biology and Fertility*  
347 *of Soils*. 31, 38-44.
- 348 Badagliacca, G., Ruisi, P., Rees, R.M., Saia, S., 2017. An assessment of factors controlling N<sub>2</sub>O and CO<sub>2</sub>  
349 emissions from crop residues using different measurement approaches. *Biology and Fertility of*  
350 *Soils*. 53, 547-561.
- 351 Bauhus, J., Meyer, A.C., Brumme, R., 1996. Effect of the inhibitors nitrapyrin and sodium chlorate on  
352 nitrification and N<sub>2</sub>O formation in an acid forest soil. *Biology and Fertility of Soils*. 22, 318-  
353 325.
- 354 Beauchamp E G , Trevors J T , Paul J W, 1989. Carbon sources for bacterial denitrification. *Advances in*  
355 *Soil Science*. 10, 113-142.
- 356 Butterbach-Bahl, K., Baggs, E.M., Dannenmann, M., Kiese, R., Zechmeister-Boltenstern, S., 2013.  
357 Nitrous oxide emissions from soils: how well do we understand the processes and their controls?  
358 *Philosophical Transactions of The Royal Society B Biological Sciences*. 368, 20130122.
- 359 Chapuis-Lardy, L., Wrage, N., Metay, A., Chotte, J.-L., Bernoux, M., 2007. Soils, a sink for N<sub>2</sub>O? A  
360 review. *Global Change Biology*. 13, 1-17.
- 361 Chen, H., X. Li, F. Hu, and W. Shi. 2013. Soil nitrous oxide emissions following crop residue addition:  
362 a meta-analysis. *Global Change Biology*. 19, 2956-2964.
- 363 Chen, Z., Wang, H., Liu, X., Zhao, X., Lu, D., Zhou, J., Li, C., 2017. Changes in soil microbial  
364 community and organic carbon fractions under short-term straw return in a rice–wheat cropping  
365 system. *Soil and Tillage Research*. 165, 121-127.
- 366 Di, H.J., Cameron, K.C., Podolyan, A., Robinson, A., 2014. Effect of soil moisture status and a  
367 nitrification inhibitor, dicyandiamide, on ammonia oxidizer and denitrifier growth and nitrous

- 368 oxide emissions in a grassland soil. *Soil Biology & Biochemistry*. 73, 59-68.
- 369 Di, H.J., Cameron, K.C., Sherlock, R.R., 2007. Comparison of the effectiveness of a nitrification inhibitor,  
370 dicyandiamide, in reducing nitrous oxide emissions in four different soils under different  
371 climatic and management conditions. *Soil Use and Management*. 23, 1-9.
- 372 Ding, W.X., Chen, Z.M., Yu, H.Y., Luo, J.F., Yoo, G.Y., Xiang, J., Zhang, H.J., Yuan, J.J., 2015. Nitrous  
373 oxide emission and nitrogen use efficiency in response to nitrophosphate, N-(n-butyl)  
374 thiophosphoric triamide and dicyandiamide of a wheat cultivated soil under sub-humid  
375 monsoon conditions. *Biogeosciences*. 12, 803-815.
- 376 Ding, W.X., Yu, H.Y., Cai, Z.C., 2011. Impact of urease and nitrification inhibitors on nitrous oxide  
377 emissions from fluvo-aquic soil in the North China Plain. *Biology and Fertility of Soils*. 47, 91-  
378 99.
- 379 Dixon, P., 2003. VEGAN, a package of R functions for community ecology. *Journal of Vegetation*  
380 *Science*. 14, 927-930.
- 381 Ginestet, C., 2011. ggplot2: Elegant Graphics for Data Analysis. *Journal of the Royal Statistical Society*  
382 *Series a-Statistics in Society*. 174, 245-245.
- 383 Granli, T., Bockman, O.C., 1994. Nitrous oxide (N<sub>2</sub>O) from agriculture. Third Congress of the European  
384 Society for Agronomy, Proceedings, 800-801.
- 385 Guo, L.J., Zhang, Z.S., Wang, D.D., Li, C.F., Cao, C.G., 2014. Effects of short-term conservation  
386 management practices on soil organic carbon fractions and microbial community composition  
387 under a rice-wheat rotation system. *Biology and Fertility of Soils*. 51, 65-75.
- 388 Hallin, S., Lindgren, P.E., 1999. PCR detection of genes encoding nitrile reductase in denitrifying  
389 bacteria. *Applied and Environmental Microbiology*. 65, 1652-1657.
- 390 Harter, J., Krause, H.M., Schuettler, S., Ruser, R., Fromme, M., Scholten, T., Kappler, A., Behrens, S.,  
391 2014. Linking N<sub>2</sub>O emissions from biochar-amended soil to the structure and function of the N-  
392 cycling microbial community. *The ISME journal*. 8, 660-674.
- 393 Hu, H.W., Chen, D., He, J.Z., 2015. Microbial regulation of terrestrial nitrous oxide formation:  
394 understanding the biological pathways for prediction of emission rates. *FEMS microbiology*  
395 *reviews* . 39, 729-749.
- 396 Hu, H.W., Zhang, L.M., Yuan, C.L., Zheng, Y., Wang, J.T., Chen, D., He, J.Z., 2015. The large-scale  
397 distribution of ammonia oxidizers in paddy soils is driven by soil pH, geographic distance, and  
398 climatic factors. *Frontiers in Microbiology*. 6:938.
- 399 Huang, Y., Zou, J., Zheng, X., Wang, Y., Xu, X., 2004. Nitrous oxide emissions as influenced by  
400 amendment of plant residues with different C:N ratios. *Soil Biology & Biochemistry*. 36, 973-  
401 981.
- 402 IPCC, 2013. Climate Change 2013: The Physical Science Basis. Contribution of Working Group I to the  
403 Fifth Assessment Report of the Intergovernmental Panel on Climate Change [Stocker, T.F., D.  
404 Qin, G.-K. Plattner, M. Tignor, S.K. Allen, J. Boschung, A. Nauels, Y. Xia, V. Bex and P.M.  
405 Midgley (eds.)]. Cambridge University Press, Cambridge, United Kingdom and New York, NY,  
406 USA 1535PP.
- 407 IPCC, 2014. Climate Change 2014: Synthesis Report. Contribution of Working Groups I, II and III to  
408 the Fifth Assessment Report of the Intergovernmental Panel on Climate Change.[Core Writing  
409 Team, R.K. Pachauri and L.A. Meyer (eds.)]. IPCC.Geneva, Switzerland 151 pp.
- 410 Jensen, L.S., Mueller, T., Magid, J., Nielsen, N.E., 1997. Temporal variation of C and N mineralization,  
411 microbial biomass and extractable organic pools in soil after oilseed rape straw incorporation in

- 412 the field. *Soil Biology & Biochemistry*. 29(7), 1043-1055.
- 413 Jones, C. M., and S. Hallin. 2010. Ecological and evolutionary factors underlying global and local  
414 assembly of denitrifier communities. *The ISME Journal*. 4, 633-641.
- 415 Lam, S.K., Suter, H., Mosier, A.R., Chen, D., 2017. Using nitrification inhibitors to mitigate agricultural  
416 N<sub>2</sub>O emission: a double-edged sword? *Global Change Biology*. 23, 485-489.
- 417 Li, F., Cao, X., Zhao, L., Yang, F., Wang, J., Wang, S., 2013. Short-term effects of raw rice straw and its  
418 derived biochar on greenhouse gas emission in five typical soils in China. *Soil Science and Plant  
419 Nutrition*. 59, 800-811.
- 420 Liang, B.C., Gregorich, E.G., Schnitzer, M., Voroney, R.P., 1996. Carbon mineralization in soils of  
421 different textures as affected water-soluble organic carbon extracted from composted dairy  
422 manure. *Biology and Fertility of Soils*. 21, 10-16.
- 423 Liu, C., Lu, M., Cui, J., Li, B., Fang, C., 2014. Effects of straw carbon input on carbon dynamics in  
424 agricultural soils: a meta-analysis. *Global Change Biology*. 20, 1366-1381.
- 425 Lu, F., Wang, X., Han, B., Ouyang, Z., Duan, X., Zheng, H., 2010. Net mitigation potential of straw  
426 return to Chinese cropland: estimation with a full greenhouse gas budget model. *Ecological  
427 Applications*. 20, 634-647.
- 428 Meng, X., Li, Y., Yao, H., Wang, J., Dai, F., Wu, Y., Chapman, S., 2020. Nitrification and urease inhibitors  
429 improve rice nitrogen uptake and prevent denitrification in alkaline paddy soil. *Applied Soil  
430 Ecology*. 154.
- 431 Miller, M. N., C. E. Dandie, B. J. Zebarth, D. L. Burton, C. Goyer, and J. T. Trevors. 2012. Influence of  
432 carbon amendments on soil denitrifier abundance in soil microcosms. *Geoderma*. 170:48-55.
- 433 Miller, M.N., Zebarth, B.J., Dandie, C.E., Burton, D.L., Goyer, C., Trevors, J.T., 2008. Crop residue  
434 influence on denitrification, N<sub>2</sub>O emissions and denitrifier community abundance in soil. *Soil  
435 Biology and Biochemistry*. 40, 2553-2562.
- 436 Ning, J., Ai, S., Cui, L., 2018. Dicyandiamide has more inhibitory activities on nitrification than  
437 thiosulfate. *PLoS One*. 13, e0200598.
- 438 Ravishankara, A.R., Daniel, J.S., Portmann, R.W., 2009. Nitrous Oxide (N<sub>2</sub>O): The Dominant Ozone-  
439 Depleting Substance Emitted in the 21st Century. *Science*. 326, 123-125.
- 440 Signor, D., Cerri, C.E.P., 2013. Nitrous oxide emissions in agricultural soils: a review. *Pesquisa  
441 Agropecuária Tropical*. 43, 322-338.
- 442 Snyder, C.S., Bruulsema, T.W., Jensen, T.L., Fixen, P.E., 2009. Review of greenhouse gas emissions from  
443 crop production systems and fertilizer management effects. *Agriculture Ecosystems &  
444 Environment* 133, 247-266.
- 445 Throback, I.N., Enwall, K., Jarvis, A., Hallin, S., 2004. Reassessing PCR primers targeting *nirS*, *nirK*  
446 and *nosZ* genes for community surveys of denitrifying bacteria with DGGE. *Fems Microbiology  
447 Ecology*. 49, 401-417.
- 448 Wang, H., Liu, S., Zhang, X., Mao, Q., Li, X., You, Y., Wang, J., Zheng, M., Zhang, W., Lu, X., Mo, J.,  
449 2018a. Nitrogen addition reduces soil bacterial richness, while phosphorus addition alters  
450 community composition in an old-growth N-rich tropical forest in southern China. *Soil Biology  
451 and Biochemistry*. 127, 22-30.
- 452 Wang, W., Lai, D.Y.F., Wang, C., Pan, T., Zeng, C., 2015. Effects of rice straw incorporation on active  
453 soil organic carbon pools in a subtropical paddy field. *Soil and Tillage Research*. 152, 8-16.
- 454 Wang, Y.Q., Bai, R., Di, H.J., Mo, L.Y., Han, B., Zhang, L.M., He, J.Z., 2018b. Differentiated  
455 Mechanisms of Biochar Mitigating Straw-Induced Greenhouse Gas Emissions in Two

- 456           Contrasting Paddy Soils. *Frontiers in Microbiology*. 9, 2566.
- 457   Wolt, J.D., 2004. A meta-evaluation of nitrapyrin agronomic and environmental effectiveness with  
458           emphasis on corn production in the Midwestern USA. *Nutrient Cycling in Agroecosystems*. 69,  
459           23-41.
- 460   Wu, L., Hu, R., Tang, S., Shaaban, M., Zhang, W., Shen, H., Xu, M., 2020. Nitrous oxide emissions in  
461           response to straw incorporation is regulated by historical fertilization. *Environmental Pollution*.  
462           266, 115292.
- 463   Xu, C., Han, X., Ru, S., Cardenas, L., Rees, R.M., Wu, D., Wu, W., Meng, F., 2019. Crop straw  
464           incorporation interacts with N fertilizer on N<sub>2</sub>O emissions in an intensively cropped farmland.  
465           *Geoderma*. 341, 129-137.
- 466   Yang, L., Zhang, X., Ju, X., 2017. Linkage between N<sub>2</sub>O emission and functional gene abundance in an  
467           intensively managed calcareous fluvo-aquic soil. *Scientific Reports*. 7, 43283.
- 468   Zhao, X., B.-Y. Liu, S.-L. Liu, J.-Y. Qi, X. Wang, C. Pu, S.S. Li, X.Z. Zhang, X.G. Yang, R. Lal, F. Chen,  
469           and H.-L. Zhang. 2020. Sustaining crop production in China's cropland by crop residue retention:  
470           A meta-analysis. *Land Degradation & Development*. 31, 694-709.
- 471   Zhou, X., S. Wang, S. Ma, X. Zheng, Z. Wang, and C. Lu. 2020. Effects of commonly used nitrification  
472           inhibitors-dicyandiamide (DCD), 3, 4-dimethylpyrazole phosphate (DMPP), and nitrapyrin-on  
473           soil nitrogen dynamics and nitrifiers in three typical paddy soils. *Geoderma*. 380.
- 474   Zhou, Y., Zhang, Y., Tian, D., Mu, Y., 2016. Impact of dicyandiamide on emissions of nitrous oxide,  
475           nitric oxide and ammonia from agricultural field in the North China Plain. *Journal of*  
476           *Environmental Sciences-China*. 40, 20-27.
- 477   Zhu, G. D., X. T. Song, X. T. Ju, J. B. Zhang, C. Muller, R. Sylvester-Bradley, R. E. Thorman, I. Bingham,  
478           and R. M. Rees. 2019. Gross N transformation rates and related N<sub>2</sub>O emissions in Chinese and  
479           UK agricultural soils. *Science of the Total Environment*.~ 666, 176-186.
- 480
- 481
- 482

**Fig. 1** Soil ammonia and nitrate dynamics in the black, fluvo-aquic and red soils under different fertilization treatments (a-f). Error bars present standard deviations of means (n = 4).

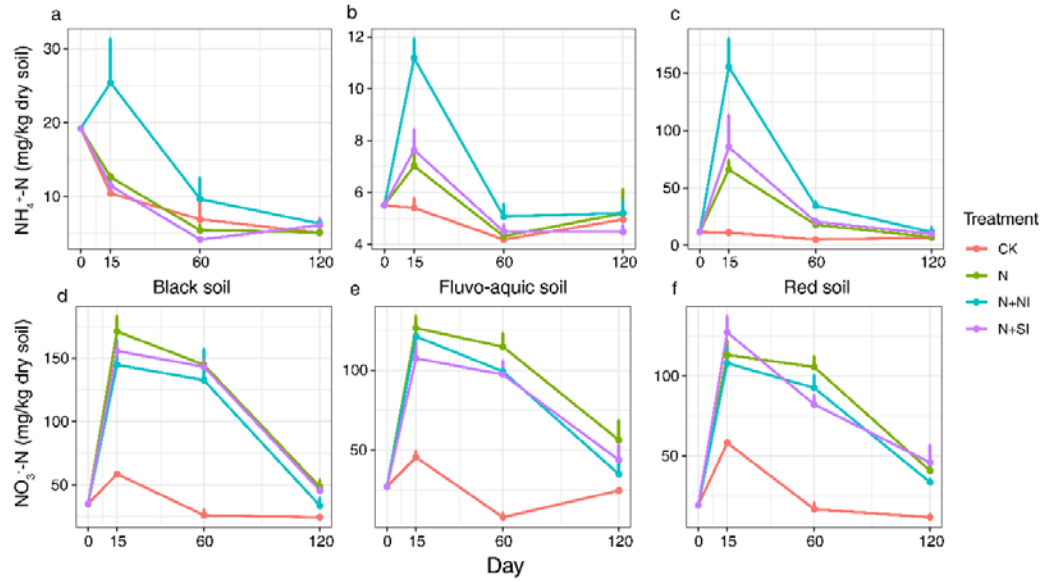

**Fig. 2** The accumulative  $N_2O$  emission during the early growth stage of corn under different fertilization treatments (a-c). Error bars present standard deviations of means ( $n = 4$ ). The different lowercase letters indicate significant difference among treatments by Duncan's multiple range test ( $P < 0.05$ ).

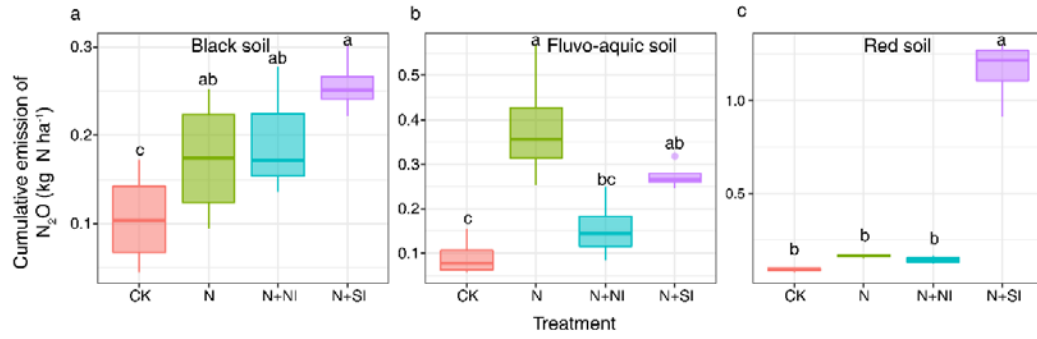



**Fig. 3** Non-metric multidimensional scaling (nMDS) of *nirK* (a) and *nosZ* (b) gene-containing denitrifiers based on the Bray-Curtis dissimilarity matrix of T-RFs among three soil types

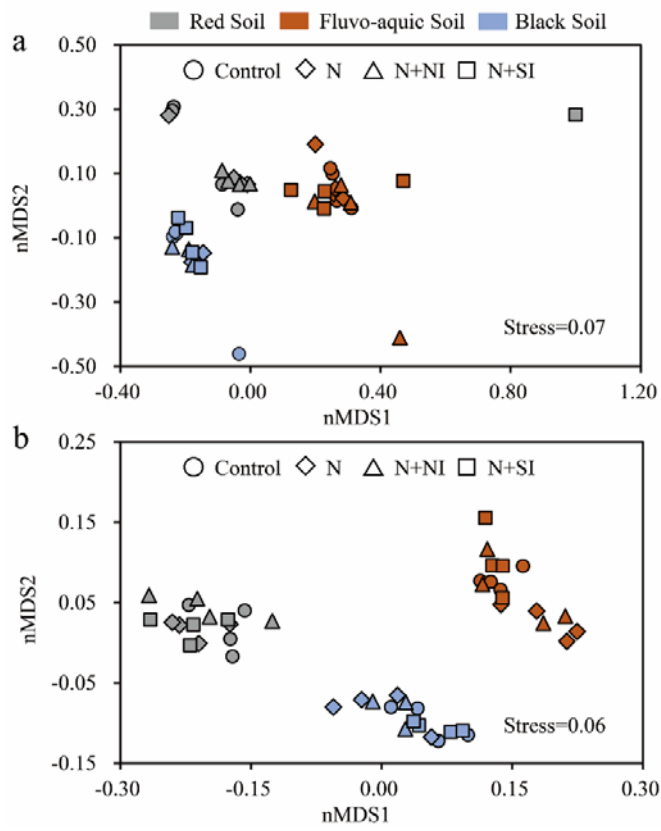

**Fig. 4** The abundance of denitrifiers (based on the copies of *nirK* and *nosZ* genes) in black, fluvo-aquic and red soils under different fertilization treatments (a-f). Error bars present standard deviations of means (n = 4). The different lowercase letters indicate significant difference among treatments Duncan's multiple range test ( $P < 0.05$ )

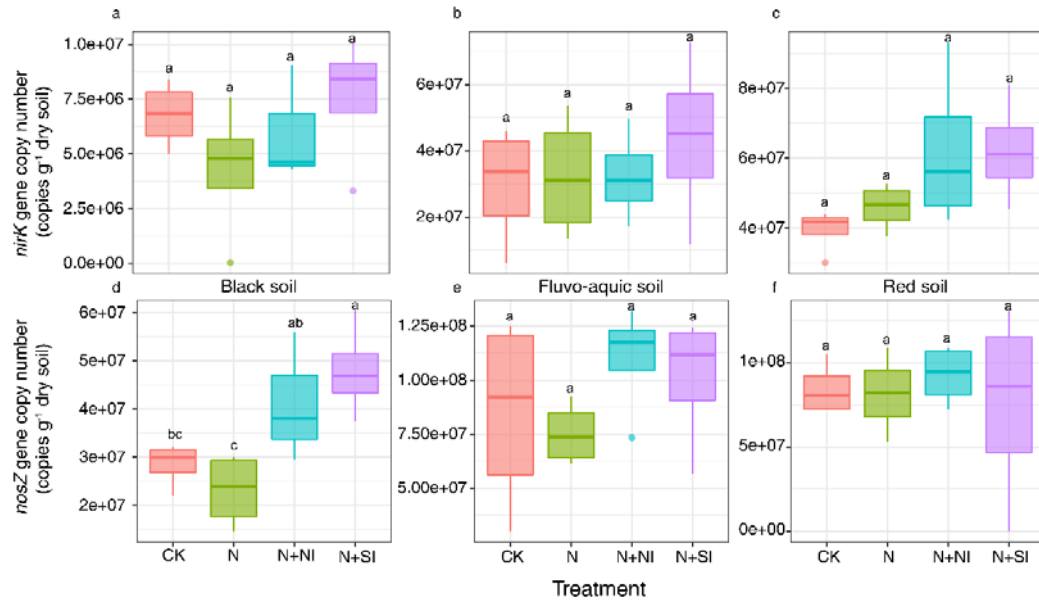

**Fig. 5** (a) The structural equation model exhibiting the effects of abiotic and biotic factors on  $N_2O$  flux. Numbers adjacent to arrows are indicative of the effect-size of the relationship. \* indicates  $P < 0.05$ ; \*\* indicates  $P < 0.01$ ; \*\*\* indicates  $P < 0.001$ . Continuous and dashed lines indicate significant and non-significant relationships, respectively. Orange, blue and grey lines indicate the colors of variables the arrows pointed to, respectively. The width of arrows is proportional to the strength of path coefficients.  $R^2$  denotes the proportion of variance explained by the model. (b) Standardized total effects (direct plus indirect effects) derived from the structural equation models depicted above.

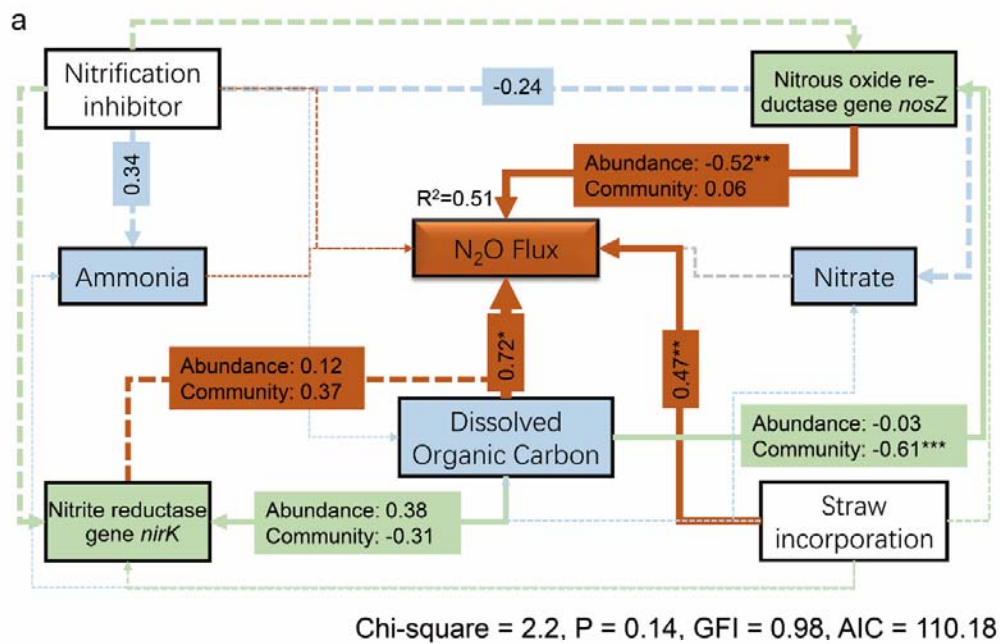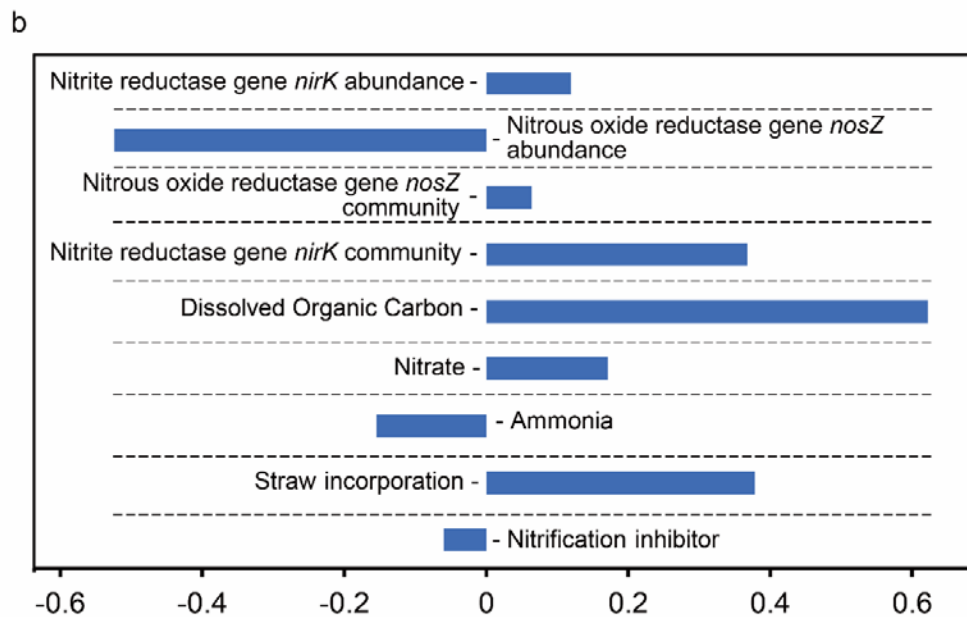

Source: https://www.biorxiv.org/content/10.1101/2021.05.26.445903v1.full.pdf
